# Supplementary material for: Pharmacokinetics and Tolerance of the Phage Endolysin-Based Candidate Drug SAL200 after a Single Intravenous Administration among Healthy Volunteers
Source: PubMed Central journal article supplement (PMC5444177; doi:10.1128/aac.02629-16), 2017-05-24
Supplement: AAC.02629-16_zac006176213s1.pdf [file AAC.02629-16_zac006176213s1.pdf]

## 1 SUPPLEMENTAL METHODS

2

3 **Immunogenicity assessment.** To assess the humoral immune response to SAL200, the serum  
4 level of antibodies against rSAL-1 was determined using a conventional bridging ELISA with  
5 streptavidin-biotin detection. As an antibody standard, anti-rSAL-1 immunoglobulins (2  
6 mg/ml) were prepared according to the conventional IgG purification method from immune  
7 sera obtained from dogs immunized with SAL200. The prepared anti-rSAL-1  
8 immunoglobulins were confirmed via immunodepletion testing. Biotinylated rSAL-1 (1  
9 mg/ml) was obtained from Younginfrontier (Seoul, Republic of Korea). The streptavidin-HRP  
10 solution (1 mg/ml) was obtained from Sigma-Aldrich (St. Louis, MO, USA). An ELISA  
11 starter kit was obtained from Koma Biotech (Seoul, Republic of Korea). ELISA was  
12 performed using a conventional method with modification. Briefly, SAL200 was diluted to 1  
13 mg/ml in a formulation buffer (1.56 g/l L-histidine [pH 6.0], 50 g/l D-sorbitol, 1.47 g/l  
14  $\text{CaCl}_2 \cdot 2\text{H}_2\text{O}$ , and 1 g/l poloxamer 188). The diluted SAL200 solution was further diluted to 1  
15  $\mu\text{g/ml}$  using the coating buffer (0.05 M sodium carbonate buffer, pH 9.6) provided in the  
16 ELISA starter kit. The prepared solution (100  $\mu\text{l}$ ) was added to each well of an ELISA plate  
17 and then covered with a plate sealer, after which the plate was incubated at 37°C for 1 h. The  
18 plate was subsequently washed three times by applying 250  $\mu\text{l}$  of washing buffer (phosphate-  
19 buffered saline [PBS] containing 0.05% Tween-20) per well. For blocking, 200  $\mu\text{l}$  of  
20 blocking buffer (PBS containing 0.05% Tween-20, 0.5% bovine serum albumin, and 20%  
21 fetal bovine serum) was added to each well to block the remaining binding sites on the plate.  
22 After the addition of the blocking buffer, the plate was incubated for 2 h at 37°C. Next, the  
23 wells were washed as described above. ELISA samples, including calibration standards,  
24 quality control standards, and test samples, were prepared during the blocking and washing

25 steps. Calibration standards, including anchor points (0.781, 1.563, 3.125, 6.25, 12.5, 25, 50,  
26 and 100 µg/ml) and quality control standards (2, 10, and 40 µg/ml), were prepared using the  
27 anti-rSAL-1 antibody standard and human pooled serum. The calibration standards, quality  
28 control standards, and test samples were diluted 1:20 in PBS, and the mixtures were briefly  
29 vortexed. The prepared ELISA samples (100 µl) were added to the wells of the plate and  
30 shaken for 1 min using an orbital shaker. The plate was subsequently incubated for 1 h at  
31 23°C. After incubation, the wells were washed again as described above. A solution of  
32 1:10,000 biotinylated rSAL-1 was prepared in a dilution buffer (PBS containing 0.05%  
33 Tween-20, 0.5% bovine serum albumin, and 10% fetal bovine serum). Then, 100 µl of the  
34 diluted biotinylated rSAL-1 solution was added to each well of the plate, and the plate was  
35 covered with a plate sealer. The plate was then incubated for 1 h at 23°C, and the wells were  
36 re-washed. A 1:10,000 streptavidin-HRP solution was prepared in a dilution buffer (PBS  
37 containing 0.05% Tween-20 and 0.5% bovine serum albumin). The diluted streptavidin-HRP  
38 solution (100 µl) was added to each well, and the plate was covered with a plate sealer. The  
39 plate was incubated for 1 h at 23°C. After incubation, the wells were re-washed. Next, 100 µl  
40 of the provided tetramethylbenzidine (TMB) substrate solution was added to each well, and  
41 the plate was incubated for no longer than 30 min at room temperature in the dark. The  
42 reaction was stopped by the addition of 100 µl of stop solution, and the OD<sub>450</sub> was recorded.  
43 The ELISA was effective in an analysis range of 1.563-50 µg/ml, and the within-run  
44 accuracy, within-run precision, between-run accuracy, and between-run precision values were  
45 95.49-107.5%, 1.770-4.919%, 94.50-110.0%, and 2.342-7.012%, respectively.

46 **Determination of rSAL-1 levels in serum.** For the pharmacokinetic analyses, the  
47 rSAL-1 levels in serum were determined using a validated double antibody sandwich ELISA.  
48 A monoclonal anti-rSAL-1 antibody and a monoclonal anti-rSAL-1 antibody conjugated to

49 HRP were obtained from Younginfrontier (Seoul, Republic of Korea). An ELISA starter kit  
50 was obtained from Koma Biotech (Seoul, Republic of Korea). ELISA was performed  
51 according to a conventional method with modification. Briefly, 1:400 dilutions of a 2-mg/ml  
52 solution of monoclonal anti-rSAL-1 antibody (capture antibody) were prepared with a  
53 coating buffer (0.05 M sodium carbonate buffer, pH 9.6). The diluted capture antibody  
54 solution (100  $\mu$ l) was added to each well of the ELISA plate and then covered with a plate  
55 sealer, after which the plate was incubated overnight at 4°C. The plate was subsequently  
56 washed five times by applying 250  $\mu$ l of a washing buffer (Tris-buffered saline [TBS]  
57 containing 0.05% Tween-20) per well. For blocking, 200  $\mu$ l of blocking buffer I (Applichem,  
58 Darmstadt, Germany) was added to each well to block the remaining binding sites on the  
59 plate. After the addition of the blocking buffer, the plate was incubated for 1 h at 37°C. Next,  
60 the wells were washed as described above. ELISA samples, including calibration standards,  
61 quality control standards, and test samples, were prepared during the blocking and washing  
62 steps. Calibration standards, including anchor point (0.008, 0.016, 0.031, 0.063, 0.125, 0.250,  
63 and 0.500  $\mu$ g/ml) and quality control standards (0.048, 0.095, and 0.350  $\mu$ g/ml), were  
64 prepared using SAL200 and human pooled serum. The calibration standards, quality control  
65 standards, and test samples were then diluted 1:10 in TBS containing 5.5 mM CaCl<sub>2</sub>, and the  
66 mixtures were briefly vortexed. The prepared ELISA samples (100  $\mu$ l) were added to the  
67 wells of the plate and shaken for 1 min using an orbital shaker. The plate was subsequently  
68 incubated for 3 h at 25°C. After incubation, the wells were re-washed as described above. A  
69 2.5-mg/ml solution of monoclonal anti-rSAL-1 antibody conjugated to HRP (detection  
70 antibody) was diluted 1:5,000 in TBS. After re-washing the plate, 100  $\mu$ l of the diluted  
71 detection antibody solution was added to each well of the plate, and the plate was covered  
72 with a plate sealer. The plate was then incubated for 2 h at 25°C, and the wells were re-

73 washed. Next, 100  $\mu$ l of the TMB substrate solution was added to each well, and the plate  
74 was incubated for no longer than 30 min at room temperature in the dark. The reaction was  
75 stopped by the addition of 100  $\mu$ l of stop solution, and the OD<sub>450</sub> was recorded. This ELISA  
76 method was effective in an analysis range of 0.016-0.500  $\mu$ g/ml, and the within-run accuracy,  
77 within-run precision, between-run accuracy, and between-run precision values were 96.88-  
78 116.7%, 2.259-15.67%, 93.92-103.4%, and 8.670-12.15%, respectively.

79 **Pharmacokinetic analysis.** Pharmacokinetic calculations were performed using the  
80 pharmacokinetic program Phoenix<sup>TM</sup> WinNonlin<sup>®</sup> version 6.3 (Pharsight, Mountain View,  
81 CA, USA) with non-compartmental methods. The C<sub>max</sub> and t<sub>max</sub> values were obtained directly  
82 from the serum concentration-time profiles. The t<sub>1/2</sub> value over the sampling period was  
83 calculated as the mean residence time from the time of dosing to the time of the last  
84 quantifiable concentration (MRT<sub>last</sub>): MRT<sub>last</sub>  $\times$  0.693. MRT<sub>last</sub> was calculated as AUMC<sub>last</sub> /  
85 AUC<sub>last</sub>, where AUMC<sub>last</sub> denotes the area under the first moment curve from time zero to the  
86 time at which the last sample with a measurable concentration was obtained. The area under  
87 the serum concentration-time curve from time zero to the time at which the last sample with a  
88 measurable concentration (AUC<sub>last</sub>) was calculated using the linear trapezoidal rule for the  
89 ascending region of the concentration-time curve and the log-linear trapezoidal rule for the  
90 descending region of the concentration-time curve. Data below the LLOQ were excluded  
91 from the AUC<sub>last</sub> calculation. The AUC from time zero to infinity (AUC<sub>inf</sub>) was estimated as  
92 AUC<sub>last</sub> + C<sub>last</sub> / K<sub>el</sub>, where C<sub>last</sub> denotes the concentration in the last serum sample at which a  
93 measurable concentration was obtained. The total body clearance (CL) was calculated as the  
94 dose / AUC<sub>inf</sub>. All data were expressed as the means  $\pm$  SDs.

95 **Pharmacodynamic assay.** Pharmacodynamics were measured using an *ex vivo*  
96 blood assay for determining blood antibacterial activity. Serum samples collected after

97 intravenous dosing were used in the *ex vivo* blood assay. Briefly, 20  $\mu$ l of *S. aureus* glycerol  
98 stock was inoculated into a 50-ml conical tube containing 20 ml of tryptic soy broth (TSB; 17  
99 g/l casein digest, 3 g/l soybean digest, 2.5 g/l dextrose, 5 g/l NaCl, and 2.5 g/l dipotassium  
100 phosphate) and incubated overnight at 37°C. Next, 20  $\mu$ l of the overnight bacterial culture  
101 was added to a 50-ml conical tube containing 20 ml of TSB medium. The conical tube was  
102 incubated at 37°C until the OD<sub>600</sub> reached 1.8-2.0, at which time 2 ml of culture was  
103 distributed evenly across the surface of a tryptic soy agar (TSA; 15 g/l casein digest, 5 g/l  
104 soybean digest, 5 g/l NaCl, and 15 g/l agar) plate, and the excess broth was removed after  
105 standing for 5 min. The inoculated plate was then allowed to dry in a laminar flow hood for  
106 approximately 30 min with the lid ajar. After drying, the plate was incubated overnight at  
107 37°C. Standards (0, 0.05, 0.1, 0.2, 0.4, 0.6, 0.8, and 1  $\mu$ g/ml) were subsequently prepared by  
108 spiking SAL200 into human pooled serum containing 10 mM CaCl<sub>2</sub>. Test samples were  
109 prepared by adding a 1% (v/v) volume of 1 M CaCl<sub>2</sub> to the serum samples collected from  
110 each participant. Then, 10- $\mu$ l aliquots of standard and test samples were spotted onto the plate.  
111 The plate was allowed to dry in a laminar flow hood for approximately 10 min with the lid  
112 ajar. The plate was incubated overnight at 37°C. Following incubation, the  
113 pharmacodynamics were accessed via a qualitative comparison of the clear zones (i.e., lysis  
114 halos) formed after spotting the test samples onto the lawn of *S. aureus* with those formed  
115 after spotting the standards.

116

117

118

119

120

121 **SUPPLEMENTAL TABLE**

122 Table S1. Adverse events after a single intravenous dose among healthy male volunteers  
 123 (cohort 5, individual)

| Participant identification | Dosing date  | Observed adverse event (number of adverse events) | Observed time      |       |       |         | Comment (number of adverse events) |
|----------------------------|--------------|---------------------------------------------------|--------------------|-------|-------|---------|------------------------------------|
|                            |              |                                                   | Day 1 <sup>b</sup> | Day 2 | Day 3 | ≥ Day 7 |                                    |
| R501 (10; A)               | Nov 12, 2013 | Rigors (1)                                        | ●                  |       |       |         | Related (1)                        |
|                            |              | Dizziness (1)                                     | ●                  |       |       |         | Related (1)                        |
|                            |              | Myalgia (2)                                       | ●                  |       |       | ●       | Related (2)                        |
|                            |              | Headache (1)                                      | ●                  |       |       |         | Related (1)                        |
|                            |              | Abdominal pain (1)                                |                    | ●     |       |         | Related (1)                        |
|                            |              | Fatigue (1)                                       |                    | ●     |       |         | Related (1)                        |
|                            |              | Pharyngitis (1)                                   |                    |       |       | ●       | Related (1)                        |
| R502 (10; A)               | Nov 12, 2013 | Rhinitis (1)                                      |                    |       |       | ●       | Related (1)                        |
|                            |              | Nausea (1)                                        | ●                  |       |       |         | Related (1)                        |
|                            |              | Dizziness (1)                                     | ●                  |       |       |         | Related (1)                        |
|                            |              | Rigors (1)                                        | ●                  |       |       |         | Related (1)                        |
|                            |              | Fatigue (1)                                       | ●                  |       |       |         | Related (1)                        |
|                            |              | Myalgia (1)                                       | ●                  |       |       |         | Related (1)                        |
| R503 (10; A)               | Nov 12, 2013 | Hypotension (1)                                   | ●                  |       |       |         | Related (1)                        |
|                            |              | Rigors (1)                                        | ●                  |       |       |         | Related (1)                        |
|                            |              | Headache (1)                                      | ●                  |       |       |         | Related (1)                        |
|                            |              | Back pain (1)                                     | ●                  |       |       |         | Related (1)                        |

|              |                 |               |     |     |                               |
|--------------|-----------------|---------------|-----|-----|-------------------------------|
|              |                 | Nausea (1)    | ●   |     | Related (1)                   |
|              |                 | Fatigue (1)   | ●   |     | Related (1)                   |
|              |                 | Dyspepsia (1) | ●   |     | Related (1)                   |
| R504 (10; P) | Nov 19,<br>2013 | None          |     |     |                               |
| R505 (10; A) | Nov 19,<br>2013 | Rigors (1)    | ●   |     | Related (1)                   |
|              |                 | Headache (1)  | ●   |     | Related (1)                   |
| R506 (10; A) | Nov 26,<br>2013 | Rhinitis (2)  | ● ● |     | Related (1)/<br>Unrelated (1) |
| R507 (10; P) | Nov 26,<br>2013 | Headache (3)  | ●   | ●/● | Related (2)/<br>Unrelated (1) |
| R508 (10; A) | Nov 26,<br>2013 | Fever (1)     | ●   |     | Related (1)                   |
|              |                 | Rhinitis (1)  |     | ●   | Unrelated (1)                 |
|              |                 | Coughing (1)  |     | ●   | Unrelated (1)                 |

124 <sup>a</sup>A, active; P, placebo

125 <sup>b</sup>Dosing day
